# Supplementary material for: Soybean Cyst Nematodes Influence Aboveground Plant Volatile Signals Prior to Symptom Development
Source: Front Plant Sci. 2021 Sep 29;12:749014. doi: 10.3389/fpls.2021.749014 (PMC8513716; doi:10.3389/fpls.2021.749014)
Supplement: Supplementary file 2 [file Table_2.XLSX]

## Sheet: Sheet1
Supplementary Table 2: The number of significant (permutation test P <0.05) and nonsignificant volatile compounds identified between SCN and mock infested plants computed at the different detection rates
Significance	% Detection	DAI 1	DAI 3	DAI 5	DAI 7	DAI 10	DAI 14
Nonsignificant	10	411	395	480	430	382	453
Significant	10	15	13	17	42	52	29
Nonsignificant	20	294	297	388	348	307	360
Significant	20	15	13	17	42	52	29
Nonsignificant	30	227	224	305	281	255	260
Significant	30	15	13	17	42	52	29
Nonsignificant	40	183	189	251	226	203	214
Significant	40	15	13	17	42	52	29
Nonsignificant	50*	149	157	202	189	162	180
Significant	50*	15	13	17	42	52	29
Nonsignificant	60	126	127	161	152	133	150
Significant	60	13	12	15	39	46	25
Nonsignificant	70	103	103	128	132	107	128
Significant	70	13	10	14	32	41	24
Nonsignificant	80	82	80	94	106	85	103
Significant	80	10	10	12	25	40	21
Nonsignificant	90	65	66	77	82	68	77
Significant	90	8	8	12	22	37	20
Nonsignificant	100	50	45	60	64	50	60
Significant	100	6	7	11	18	35	19
